# Supplementary material for: Insights into the stereoselectivity of human SETD7 methyltransferase
Source: PubMed Central journal article supplement — RSC Adv. 2019 Mar 21;9(16):9218–27. doi: 10.1039/c9ra00190e (PMC9062083; doi:10.1039/c9ra00190e), 2019-03-21
Supplement: RA-009-C9RA00190E-s001.pdf [file RA-009-C9RA00190E-s001.pdf]

## Supplementary Information

### Insights into the stereoselectivity of human SETD7 methyltransferase

Bowen Tang,<sup>#,a</sup> Baicun Li,<sup>#,a,b</sup> Boqun Li,<sup>a</sup> Jingbo Qin,<sup>a</sup> Junming Zhao,<sup>a</sup> Jianwenn Xu,<sup>a</sup> Yingkun Qiu,<sup>a</sup> Zhen Wu,<sup>\*,a</sup> Meijuan Fang<sup>\*,a</sup>

<sup>a</sup> School of Pharmaceutical Sciences and Fujian Provincial Key Laboratory of Innovative Drug Target Research, Xiamen University, Xiamen 361000, China.

<sup>b</sup> State Key Laboratory of Medical Molecular Biology, Department of Physiology, Institute of Basic Medical Sciences, Chinese Academy of Medical Sciences and School of Basic Medicine, Peking Union Medical College, Beijing, 100005, China

<sup>#</sup> These authors contribute equally to this paper.

\*Corresponding authors. Tel.: +86-592-2189868; Fax: +86-592-2189868.

E-mail address: [wuzhen@xmu.edu.cn](mailto:wuzhen@xmu.edu.cn) and [fangmj@xmu.edu.cn](mailto:fangmj@xmu.edu.cn).

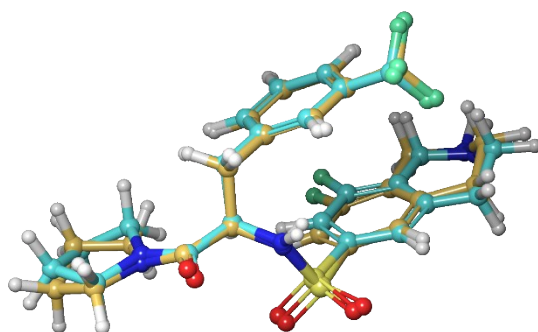

**Figure S1.** The best docked pose (cyan) and original crystal structure (yellow) were superimposed very well. The RMSD value referred to crystal pose was 0.337 Å.

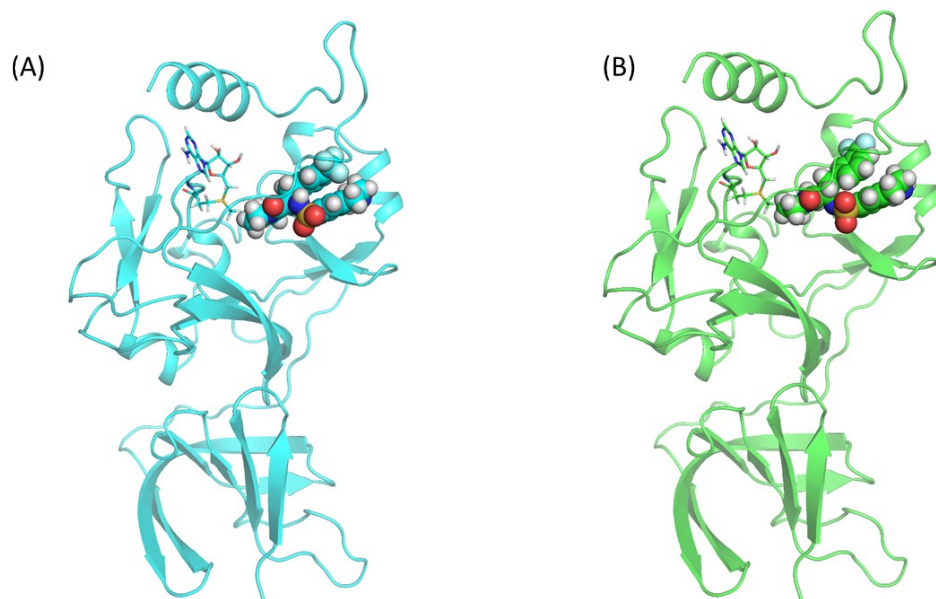

**Figure S2.** The initial structure for MD simulations. (A). The (R)-PFI-2/SETD7/SAM system was colored in cyan. (B). The (S)-PFI-2/SETD7/SAM system was colored in green. SAM and antipodes were presented with sticks and sphere.

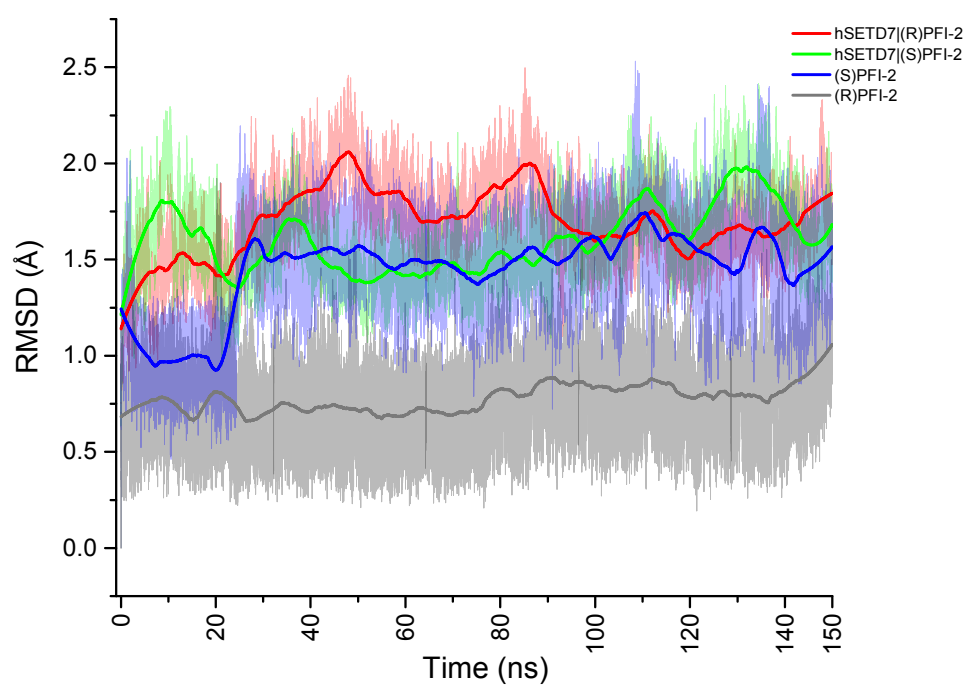

**Figure S3.** The RMSD of enantiomers and the C $\alpha$  from residues of SETD7. The average value of RMSD from both inhibitors were under 2.0 Å

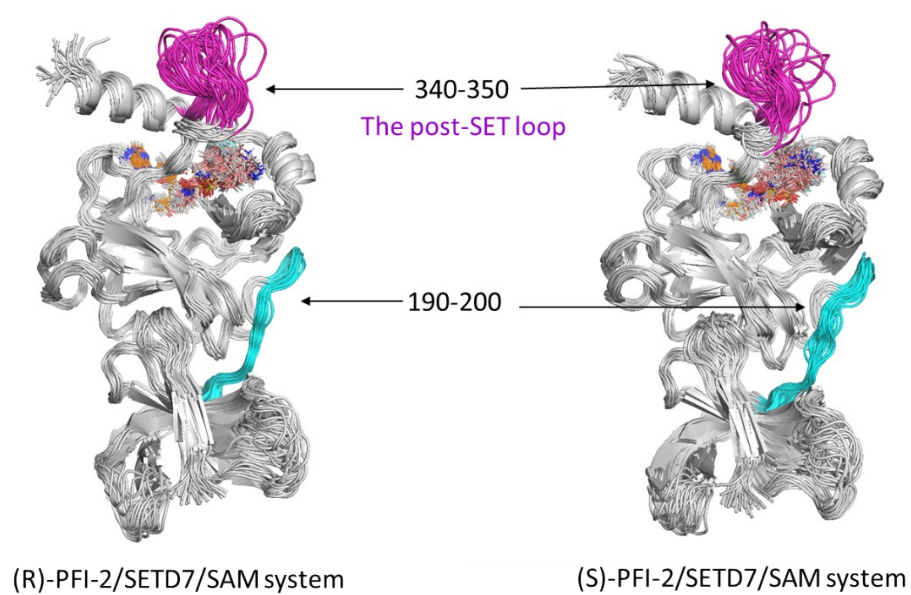

**Figure S4.** The conformation ensembles. Resides 190-200, 340-350 were in cyan and magenta color, respectively. The skeleton of protein was in white cartoon. SAM and inhibitors were displayed in orange and pink color sticks.

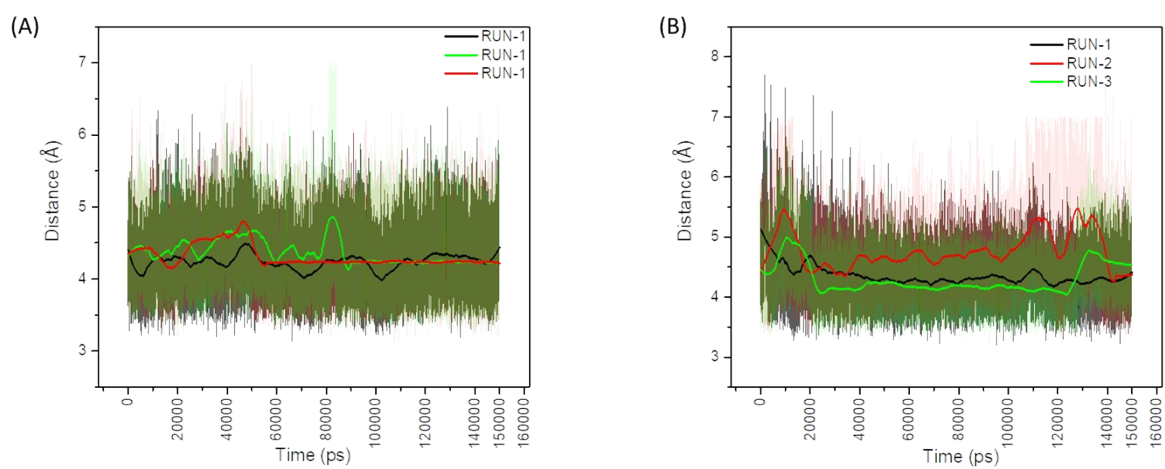

**Figure S5.** The average distance between the methyl group of SAM and the pyrrolidine moiety of inhibitor. (A). The (R)-PFI-2/SETD7/SAM system. (B). The (S)-PFI-2/SETD7/SAM system.

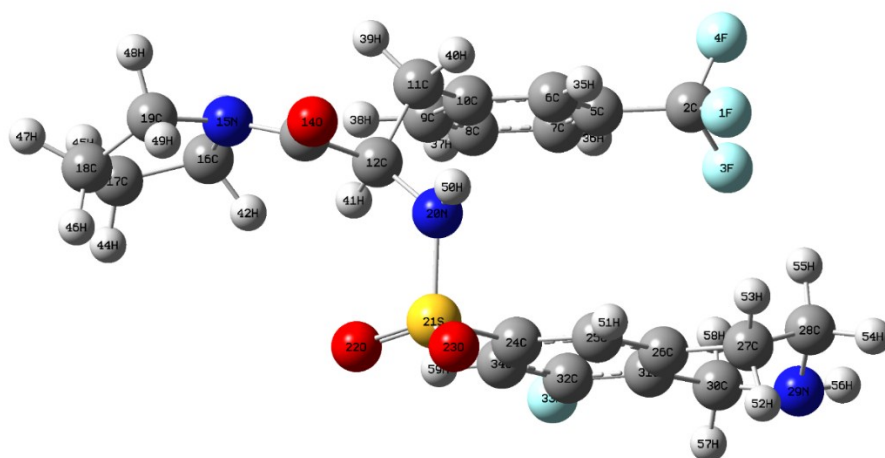

**Figure S6.** The atom labels of (R)-PFI-2 is same to (S)-PFI-2.

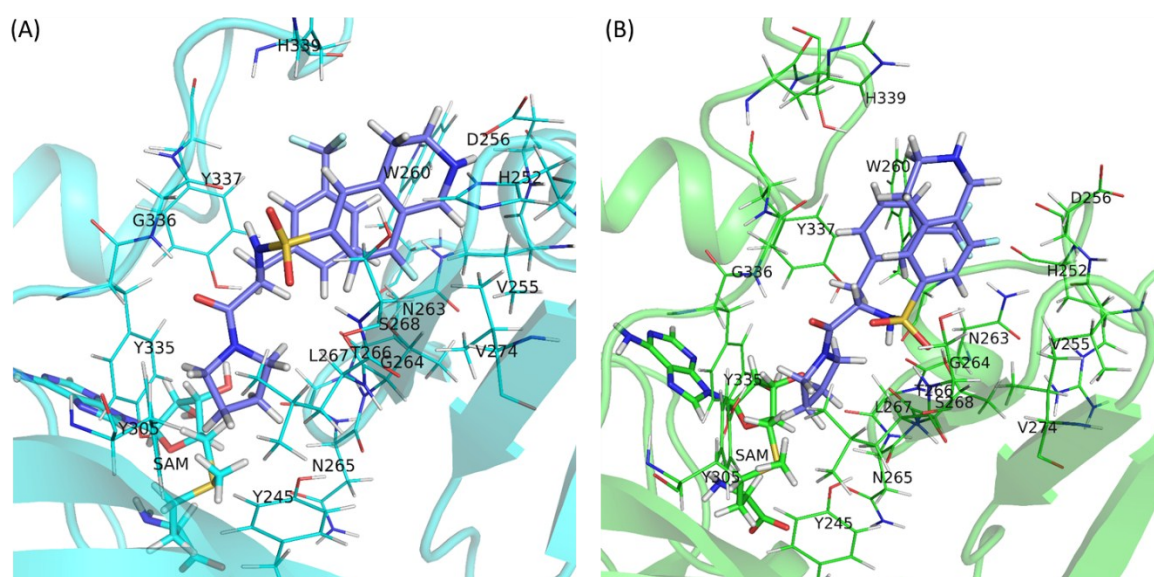

**Figure S7.** Residues are within 5 Å of the enantiomers. Both (R)-PFI-2 and (S)-PFI-2 are presented by ocean blue sticks. Co-factor SAM are displayed with sticks in different color in the ternary complex structure. Residues are showed in thin sticks with cyan and green color. (A). The (R)-PFI-2/SETD7/SAM system. (B). The (S)-PFI-2/SETD7/SAM system.

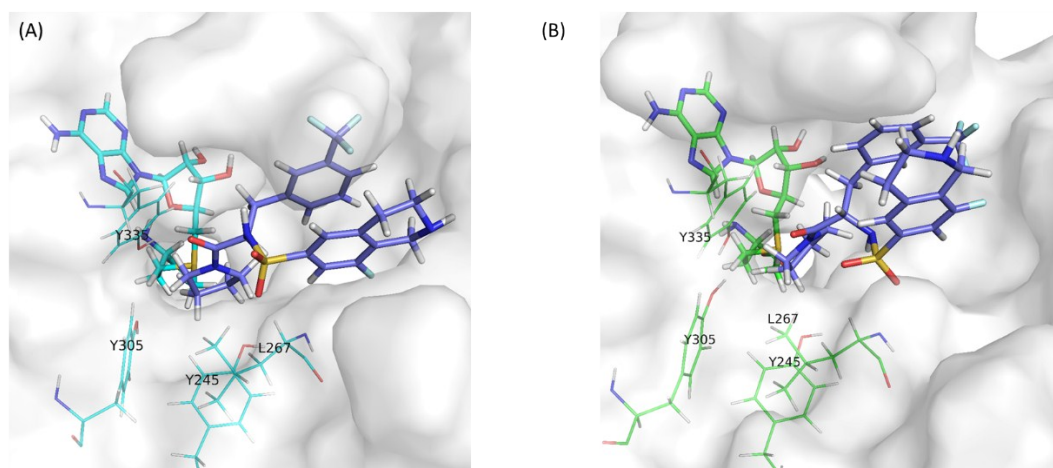

**Figure S8.** The hydrophobic channel mainly constructed by residues TYR245, LEU267, TYR305 and TYR335, which filled with the pyrrolidine moiety from enantiomers and the methyl of SAM. Both (R)-PFI-2 and (S)-PFI-2 are presented by ocean blue sticks. Co-factor SAM are displayed with sticks in different color in the ternary complex structure. Residues are showed in thin sticks with cyan and green color. (A). The (R)-PFI-2/SETD7/SAM system. (B). The (S)-PFI-2/SETD7/SAM system.
